# Supplementary material for: LPS-induced complex polarization of astrocytes and microglia in rats
Source: Research Square preprint supplement (doi:10.21203/rs.3.rs-1522218/v1), 2022-04-08
Supplement: Supplementary file 1 [file 53044723d667fb8923994482.docx]

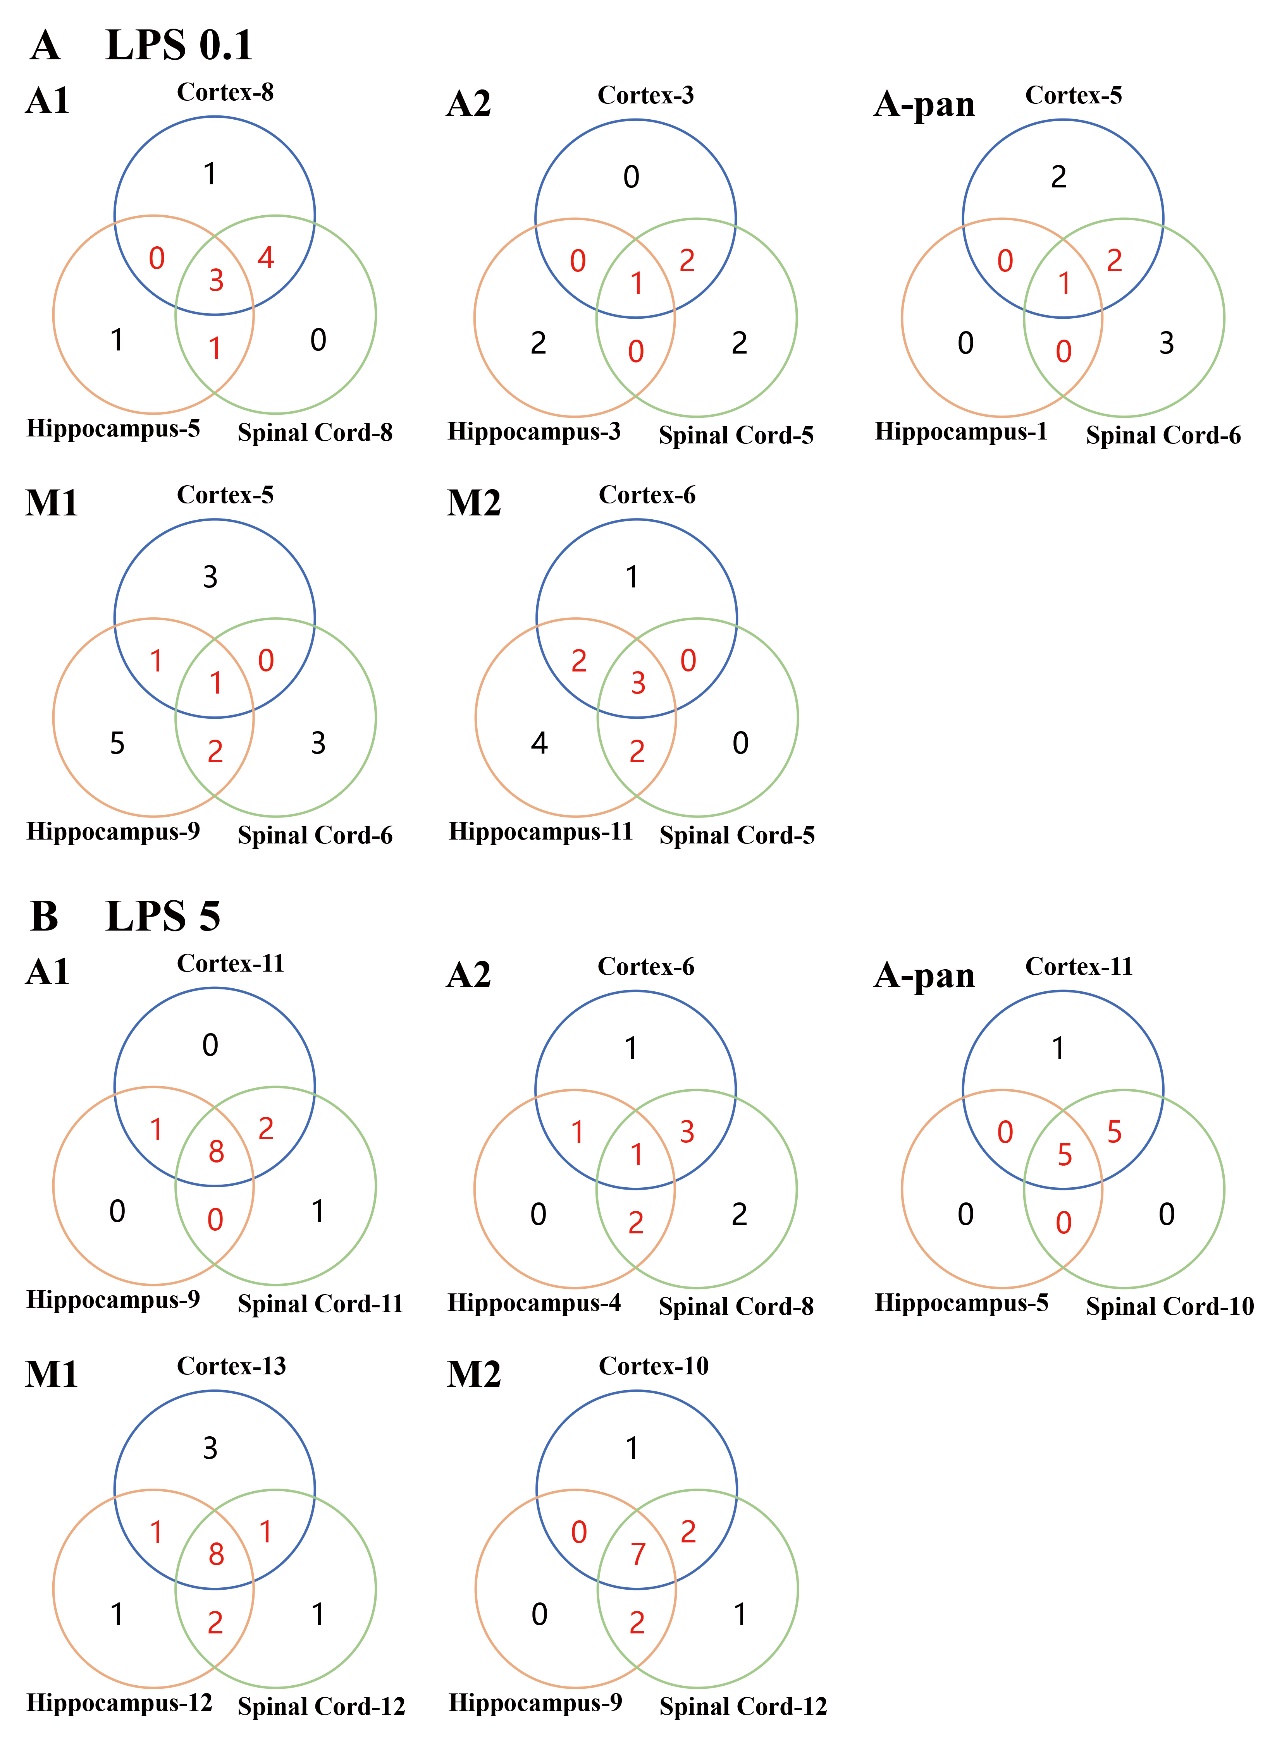


**Supplementary Fig. 1** Venn diagrams showing the number of up-regulated genes in the CNTs under LPS 0.1 (A) and 5 (B) exposure. Gene expression of activated astrocytes and microglia in the cortex, hippocampus and spinal cord were analyzed via venn diagrams. Numbers listed besides the tissue represents the total number of up-regulated genes in each tissue [cortex (blue), hippocampus (orange), spinal cord (green)]. The intersections between tissues are marked as red; the other subsets are marked as black.
